# Supplementary material for: Construction of a Three-Dimensional BaTiO3 Network for Enhanced Permittivity and Energy Storage of PVDF Composites
Source: MDPI journal article supplement (doi:10.3390/ma14133585), 2021-06-27
Supplement: s1 [file s1]

Supplementary Information

# Construction of a Three-Dimensional BaTiO<sub>3</sub> Network for Enhanced Permittivity and Energy Storage of PVDF Composites

Xueqing Bi <sup>1</sup>, Lujia Yang <sup>1</sup>, Zhen Wang <sup>1</sup>, Yanhu Zhan <sup>1</sup>, Shuangshuang Wang <sup>1</sup>, Chunmei Zhang <sup>1</sup>, Yuchao Li <sup>1,\*</sup>, Yinggang Miao <sup>2</sup> and Junwei Zha <sup>3</sup>

- <sup>1</sup> School of Materials Science and Engineering, Liaocheng University, Liaocheng 252059, China; bixueqing@gmail.com (X.B.); Iujiay0582@yeah.net (L.Y.); 2010180105@stu.lcu.edu.cn (Z.W.); zhanyanhu@lcu.edu.cn (Y.Z.); wangshuangshuang@lcu.edu.cn (S.W.); zhangchunmei@lcu.edu.cn (C.Z.)
- <sup>2</sup> Joint International Research Laboratory of Impact Dynamics and its Engineering Applications, School of Aeronautics, Northwestern Polytechnical University, Xi'an 710072, China; miaoyinggang@nwpu.edu.cn
- <sup>3</sup> School of Chemistry and Biological Engineering, University of Science and Technology Beijing, Beijing 100083, China; zhajw@ustb.edu.cn
- \* Correspondence: liyuchao@lcu.edu.cn; Tel.: +86-635-8230936

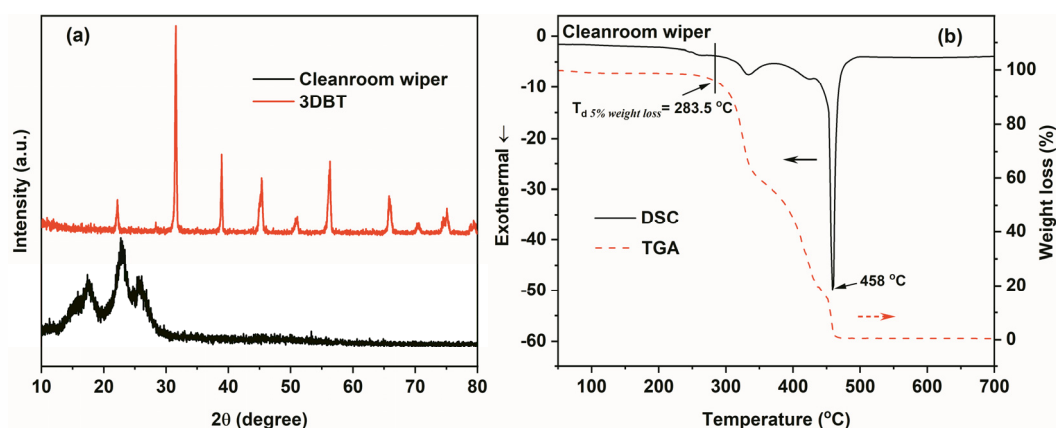

Figure S1. (a) XRD result and (b) Thermal performance of cleanroom wiper.

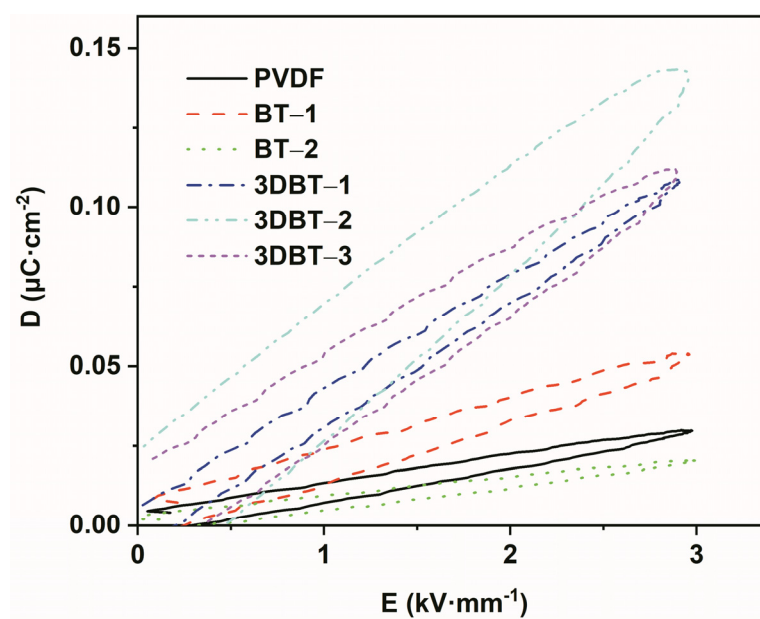

**Figure S2.** Unipolar D-E hysteresis loops of representative PVDF, BT-1, BT-2, 3DBT-1, 3DBT-2, and 3DBT-3, respectively.

**Table S1.** Dielectric and energy storage properties of the BT/polymer composites.

| Matrix     | Filler   | Filler loading | Thickness     | $f$ (Hz) | $\epsilon'$ | Tan $\delta$ | $E_b$ (Weillbull)          | U                                                      | U/ $U_m$ | Ref.      |
|------------|----------|----------------|---------------|----------|-------------|--------------|----------------------------|--------------------------------------------------------|----------|-----------|
| PVDF       | BST      | 40 vol%        | –             | 1 kHz    | 40          | 0.19         | 45 kV·mm <sup>-1</sup>     | 0.36 J·cm <sup>-3</sup> (at 1 kV·mm <sup>-1</sup> )    | <2.0     | [6]       |
| Epoxy      | 3D BT    | 16 vol%        | 0.5–1 $\mu$ m | 1 kHz    | 34.5        | 0.07         | 489.35 kV·cm <sup>-1</sup> | 8.3 mJ·cm <sup>-3</sup> (at 100 kV·cm <sup>-1</sup> )  | 16.6     | [10]      |
| Epoxy      | 3D-BTO   | 10 vol%        | 1 mm          | 1 MHz    | 42          | 0.09         | –                          | 1.57 mJ·cm <sup>-3</sup> (at 25 kV·cm <sup>-1</sup> )  | 1.45     | [19]      |
| P(VDF-HFP) | BT@Ag    | 20 vol%        | 30–40 $\mu$ m | 0.1 Hz   | 37.5        | 0.143        | 247.7 kV·mm <sup>-1</sup>  | 3.21 J·cm <sup>-3</sup> (at 140 kV·mm <sup>-1</sup> )  | ~3.2     | [24]      |
| P(VDF-HFP) | BT       | 20 vol%        | 30–40 $\mu$ m | 0.1 Hz   | 47          | 0.382        | 145.1 kV·mm <sup>-1</sup>  | 2.45 J·cm <sup>-3</sup> (at 140 kV·mm <sup>-1</sup> )  | ~1.4     | [24]      |
| PVDF       | BT@BN    | 5 wt%          | 5 $\mu$ m     | 1 kHz    | 11.3        | 0.027        | 580 kV·mm <sup>-1</sup>    | 17.6 J·cm <sup>-3</sup> (at 600 kV·mm <sup>-1</sup> )  | 2.8      | S1        |
| PVDF-epoxy | 3D BT    | 25 vol%        | 0.1–1 $\mu$ m | 1 kHz    | 200         | 0.07         | 322 kV·cm <sup>-1</sup>    | 15.7 mJ·cm <sup>-3</sup> (at 100 kV·cm <sup>-1</sup> ) | 3.48     | S2        |
| PVDF       | PHEMA@BT | 20 vol%        | 30–50 $\mu$ m | 1 kHz    | 20.2        | 0.03         | ~140 kV·mm <sup>-1</sup>   | 2.18 J·cm <sup>-3</sup> (at 140 kV·mm <sup>-1</sup> )  | ~1.1     | S3        |
| PVDF       | BT@Ni    | 3 vol%         | 10–15 $\mu$ m | 1 kHz    | 12.57       | 0.027        | 369 kV·mm <sup>-1</sup>    | 9.55 J·cm <sup>-3</sup> (at 350 kV·mm <sup>-1</sup> )  | 2.08     | S4        |
| PVDF       | 3D BT    | 7.5 vol%       | ~130 $\mu$ m  | 100 Hz   | 25.3        | 0.057        | 73.8 kV·mm <sup>-1</sup>   | 1.60 mJ·cm <sup>-3</sup> (at 3 kV·mm <sup>-1</sup> )   | 4.47     | This work |

Note: BST= barium strontium titanate; PHEMA = poly(hydroxyethyl methacrylate);  $U_m$  is the energy density of pure matrix.

## References

- S1. S. Luo, J. Yu, S. Yu, R. Sun, L. Cao, W. Liao, C. Wong, Significantly enhanced electrostatic energy storage performance of flexible polymer composites by introducing highly insulating-ferroelectric microhybrids as fillers, *Adv. Energy Mater.* 9 (2019) 1803204. DOI: 10.1002/aenm.201803204.
- S2. Z. Zhang, S. Luo, S. Yu, Z. Guan, R. Sun, C. Wong, Significantly enhanced dielectric and energy storage performance of blend polymer-based composites containing inorganic 3D-network. *Mater. Design* 142 (2018) 106-113. DOI: 10.1016/j.matdes.2018.01.009.
- S3. M. Zhu, X. Huang, K. Yang, X. Zhai, J. Zhang, J. He, P. Jiang, Energy storage in ferroelectric polymer nanocomposites filled with core-shell structured polymer@BaTiO<sub>3</sub> nanoparticles: understanding the role of polymer shells in the interfacial regions. *ACS appl. Mater. Inter.* 6 (2014) 19644-19654. DOI: 10.1021/am504428u.
- S4. G. Chen, X. Lin, J. Li, S. Huang, X. Cheng, Core-satellite ultra-small hybrid Ni@BT nanoparticles: A new route to enhanced energy storage capability of PVDF based nanocomposites. *Appl. Surf. Sci.* 513 (2020) 145877. DOI: 10.1016/j.apsusc.2020.145877.
